# Supplementary material for: Long Term Results of Follow-up After HPV Self-sampling with Devices Qvintip and HerSwab in Women Non-attending Cervical Screening Programme
Source: PubMed Central journal article supplement — Radiol Oncol. 2021 Jan 6;55(2):187–95. doi: 10.2478/raon-2021-0001 (PMC8042828; doi:10.2478/raon-2021-0001), 2021-01-06
Supplement: raon-55-187_sm.pdf [file raon-55-187_sm.pdf]

## Long term results of follow-up after HPV self-sampling with devices Qvintip and HerSwab in women non-attending cervical screening programme

Teodora Bokan, Urska Ivanus, Tine Jerman, Iztok Takac, Darja Arko

doi:10.2478/raon-2021-0001

**SUPPLEMENTARY TABLE 1.** Sensitivity, specificity, positive and negative predictive values of human papillomavirus (HPV) test by device groups and sampling modality

| Qvintip                                                                   | Sensitivity<br>(95% CI) | Specificity<br>(95% CI) | PPV<br>(95% CI)   | NPV<br>(95% CI)    |
|---------------------------------------------------------------------------|-------------------------|-------------------------|-------------------|--------------------|
| <b>HPV test on self-sample</b>                                            |                         |                         |                   |                    |
| 1 year                                                                    | 81.8 (70.89–89.8)       | 45.5 (30.69–60.0)       | 69.2 (58.29–78.8) | 62.5 (44.19–78.1)  |
| 4 years                                                                   | 83.1 (72.69–90.5)       | 51.3 (34.89–66.7)       | 75.6 (64.59–84.2) | 62.5 (44.19–77.9)  |
| <b>HPV test on gynaecologist sample</b>                                   |                         |                         |                   |                    |
| 1 year                                                                    | 98.5 (91.09–100.0)      | 57.8 (42.99–71.7)       | 77.4 (67.49–85.2) | 96.3 (77.89–100.0) |
| 4 years                                                                   | 94.4 (86.49–98.5)       | 57.5 (41.29–87.3)       | 79.8 (69.89–87.3) | 85.2 (65.59–95.7)  |
| <b>Ratio HPV test on self-sample vs. HPV test on gynaecologist sample</b> |                         |                         |                   |                    |
| 1 year                                                                    | 0.83                    | 0.79                    | 0.89              | 0.65               |
| 4 years                                                                   | 0.88                    | 0.89                    | 0.95              | 0.73               |
| HerSwab                                                                   | Sensitivity<br>(95% CI) | Specificity<br>(95% CI) | PPV<br>(95% CI)   | NPV<br>(95% CI)    |
| <b>HPV test on self-sample</b>                                            |                         |                         |                   |                    |
| 1 year                                                                    | 77.6 (63.89–87.8)       | 48.9 (34.69–63.4)       | 61.3 (48.39–72.9) | 67.6 (50.09–81.8)  |
| 4 year                                                                    | 75.0 (61.39–85.4)       | 47.7 (33.39–62.8)       | 62.9 (50.09–74.2) | 61.8 (43.99–77.3)  |
| <b>HPV test on gynaecologist sample</b>                                   |                         |                         |                   |                    |
| 1 year                                                                    | 94.0 (83.39–98.1)       | 41.7 (27.99–55.8)       | 62.7 (51.39–73.0) | 87.0 (65.49–96.3)  |
| 4 year                                                                    | 94.3 (84.49–98.2)       | 44.4 (30.09–59.2)       | 66.7 (54.89–76.4) | 87.0 (65.49–96.2)  |
| <b>Ratio HPV test on self-sample vs. HPV test on gynaecologist sample</b> |                         |                         |                   |                    |
| 1 year                                                                    | 0.83                    | 1.17                    | 0.98              | 0.78               |
| 4 years                                                                   | 0.80                    | 1.07                    | 0.94              | 0.71               |

CI = confidence interval; NPV = negative predictive value; PPV = positive predictive value

**SUPPLEMENTARY TABLE 2.** Sensitivity, specificity, positive and negative predictive values of cytology by device groups for cervical intraepithelial neoplasia grade 2 or more (CIN2+)

| <b>Pap at cut-off<br/>ASC-US+</b>                                        | <b>Sensitivity (95%<br/>CI)</b> | <b>Specificity (95%<br/>CI)</b> | <b>PPV (95% CI)</b> | <b>NPV (95% CI)</b> |
|--------------------------------------------------------------------------|---------------------------------|---------------------------------|---------------------|---------------------|
| <b>Qvintip</b>                                                           |                                 |                                 |                     |                     |
| <b>1 year</b>                                                            | 72.7 (60.69–82.5)               | 71.1 (55.89–82.9)               | 78.7 (66.79–87.7)   | 64.0 (49.19–76.2)   |
| <b>4 years</b>                                                           | 71.8 (60.39–81.4)               | 75.0 (58.59–86.5)               | 83.6 (72.19–91.5)   | 60.0 (45.39–72.5)   |
| <b>Qvintip: Ratio HPV test on self-sample vs. Pap at cut-off ASC-US+</b> |                                 |                                 |                     |                     |
| <b>1 year</b>                                                            | 1.13                            | 0.64                            | 0.88                | 0.98                |
| <b>4 years</b>                                                           | 1.16                            | 0.68                            | 0.90                | 1.04                |
| <b>HerSwab</b>                                                           |                                 |                                 |                     |                     |
| <b>1 year</b>                                                            | 76.0 (61.89–86.4)               | 50.0 (34.69–63.0)               | 61.3 (48.59–72.7)   | 66.7 (48.69–80.4)   |
| <b>4 year</b>                                                            | 71.7 (58.09–82.7)               | 46.7 (32.09–61.5)               | 61.3 (49.09–72.9)   | 58.3 (41.29–73.7)   |
| <b>HerSwab: Ratio HPV test on self-sample vs. Pap at cut-off ASC-US+</b> |                                 |                                 |                     |                     |
| <b>1 year</b>                                                            | 1.02                            | 0.98                            | 1.00                | 1.01                |
| <b>4 year</b>                                                            | 1.05                            | 1.02                            | 1.03                | 1.06                |

ASC-US+ = atypical squamous cells of undetermined significance or more; CI = confidence interval; NPV = negative predictive value; PPV = positive predictive value

| Year | Qvintip     |            |              |                                  | HerSwab     |            |              |                                  |
|------|-------------|------------|--------------|----------------------------------|-------------|------------|--------------|----------------------------------|
|      | At risk (n) | Events (n) | Censored (n) | Cumulative incidence (%), 95% CI | At risk (n) | Events (n) | Censored (n) | Cumulative incidence (%), 95% CI |

## HPV self-sample

|          |   |    |    |   |                  |    |    |   |                  |
|----------|---|----|----|---|------------------|----|----|---|------------------|
| Negative | 0 | 32 | 3  | 0 | 9.4 (0.0–18.9)   | 34 | 6  | 0 | 17.6 (3.8–29.5)  |
|          | 1 | 20 | 9  | 0 | 37.5 (18.3–52.2) | 23 | 5  | 0 | 32.4 (14.7–46.4) |
|          | 2 | 20 | 0  | 0 | 37.5 (18.3–52.2) | 22 | 1  | 0 | 35.3 (17.1–49.5) |
|          | 3 | 20 | 0  | 0 | 37.5 (18.3–52.2) | 21 | 1  | 0 | 38.2 (19.5–52.6) |
|          | 4 | 20 | 0  | 0 | 37.5 (18.3–52.2) | 19 | 0  | 2 | 38.2 (19.5–52.6) |
|          | 5 | 20 | 0  | 0 | 37.5 (18.3–52.2) | 11 | 0  | 8 | 38.2 (19.5–52.6) |
| Positive | 0 | 78 | 27 | 0 | 34.6 (23.2–44.4) | 62 | 32 | 0 | 51.6 (37.4–62.6) |
|          | 1 | 24 | 27 | 0 | 69.2 (57.1–77.9) | 24 | 6  | 0 | 61.3 (47.1–71.7) |
|          | 2 | 20 | 4  | 0 | 74.4 (62.6–82.4) | 22 | 1  | 1 | 62.9 (48.7–73.2) |
|          | 3 | 19 | 1  | 0 | 75.6 (64.0–83.5) | 22 | 0  | 0 | 62.9 (48.7–73.2) |
|          | 4 | 19 | 0  | 0 | 75.6 (64.0–83.5) | 22 | 0  | 0 | 62.9 (48.7–73.2) |
|          | 5 | 19 | 0  | 0 | 75.6 (64.0–83.5) | 15 | 0  | 7 | 62.9 (48.7–73.2) |

## HPV gynaecologist

|          |   |    |    |   |                  |    |    |   |                  |
|----------|---|----|----|---|------------------|----|----|---|------------------|
| Negative | 0 | 27 | 0  | 0 | 0.0 (0.0–0.0)    | 23 | 1  | 0 | 4.3 (0.0–12.3)   |
|          | 1 | 26 | 1  | 0 | 3.7 (0.0–10.6)   | 20 | 2  | 0 | 13.0 (0.0–25.8)  |
|          | 2 | 24 | 2  | 0 | 11.1 (0.0–22.2)  | 20 | 0  | 0 | 13.0 (0.0–25.8)  |
|          | 3 | 23 | 1  | 0 | 14.8 (0.3–27.2)  | 20 | 0  | 0 | 13.0 (0.0–25.8)  |
|          | 4 | 23 | 0  | 0 | 14.8 (0.3–27.2)  | 19 | 0  | 1 | 13.0 (0.0–25.8)  |
|          | 5 | 23 | 0  | 0 | 14.8 (0.3–27.2)  | 10 | 0  | 9 | 13.0 (0.0–25.8)  |
| Positive | 0 | 84 | 30 | 0 | 35.7 (24.6–45.2) | 75 | 37 | 0 | 49.3 (36.7–59.5) |
|          | 1 | 19 | 35 | 0 | 77.4 (66.4–84.8) | 28 | 10 | 0 | 62.7 (49.9–72.2) |
|          | 2 | 17 | 2  | 0 | 79.8 (69.1–86.8) | 25 | 2  | 1 | 65.3 (52.7–74.6) |
|          | 3 | 17 | 0  | 0 | 79.8 (69.1–86.8) | 24 | 1  | 0 | 66.7 (54.1–75.9) |
|          | 4 | 17 | 0  | 0 | 79.8 (69.1–86.8) | 23 | 0  | 1 | 66.7 (54.1–75.9) |
|          | 5 | 17 | 0  | 0 | 79.8 (69.1–86.8) | 17 | 0  | 6 | 66.7 (54.1–75.9) |
